# Supplementary material
Source: MDPI journal article supplement (https://www.mdpi.com/2079-9292/5/4/91)
Supplement: s1 [file s1]

Supplementary Materials: Energetic Stabilities, Structural and Electronic Properties of Monolayer Graphene Doped with Boron and Nitrogen Atoms

Seba Sara Varghese, Sundaram Swaminathan, Krishna Kumar Singh and Vikas Mittal

The test of convergence data is achieved by performing calculations at successively higher cutoff energies and denser k-point grids until the total energy does not change at all. Figures S1 and S2 present the convergence of total energy of the unit cell of graphene (two carbon atoms) as a function of plane wave cutoff energy using a Monkhorst–Pack-grid of 24 × 24 × 1 and as a function of the k-point mesh using a cutoff energy of 816 eV, respectively.

**
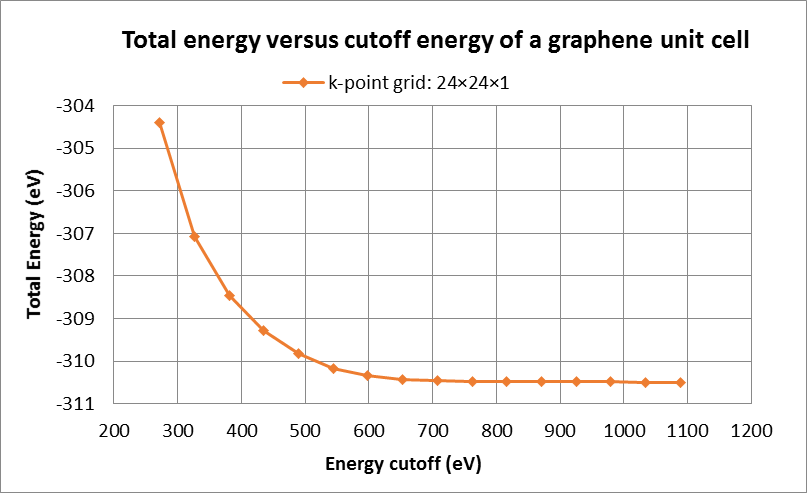
**

**Figure S1.** Convergence curve showing total energy against the plane wave cutoff energy.

**
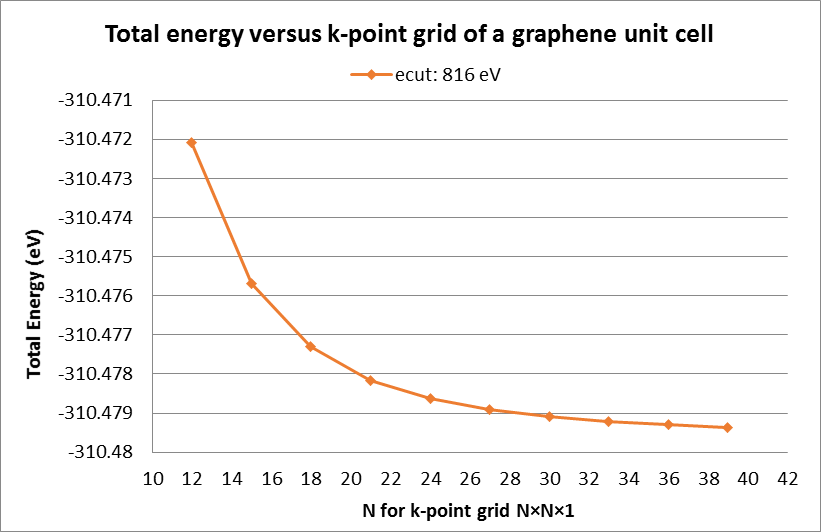
**

**Figure S2.** Convergence curve showing total energy against the k-point grid.
